# Supplementary material for: Methylation of Subtelomeric Chromatin Modifies the Expression of the lncRNA TERRA, Disturbing Telomere Homeostasis
Source: Int J Mol Sci. 2022 Mar 18;23(6):3271. doi: 10.3390/ijms23063271 (PMC8955364; doi:10.3390/ijms23063271)
Supplement: Supplementary file 1 [file ijms-23-03271-s001.zip › ijms-1618448-supplementary.pdf]

## Coding Probability

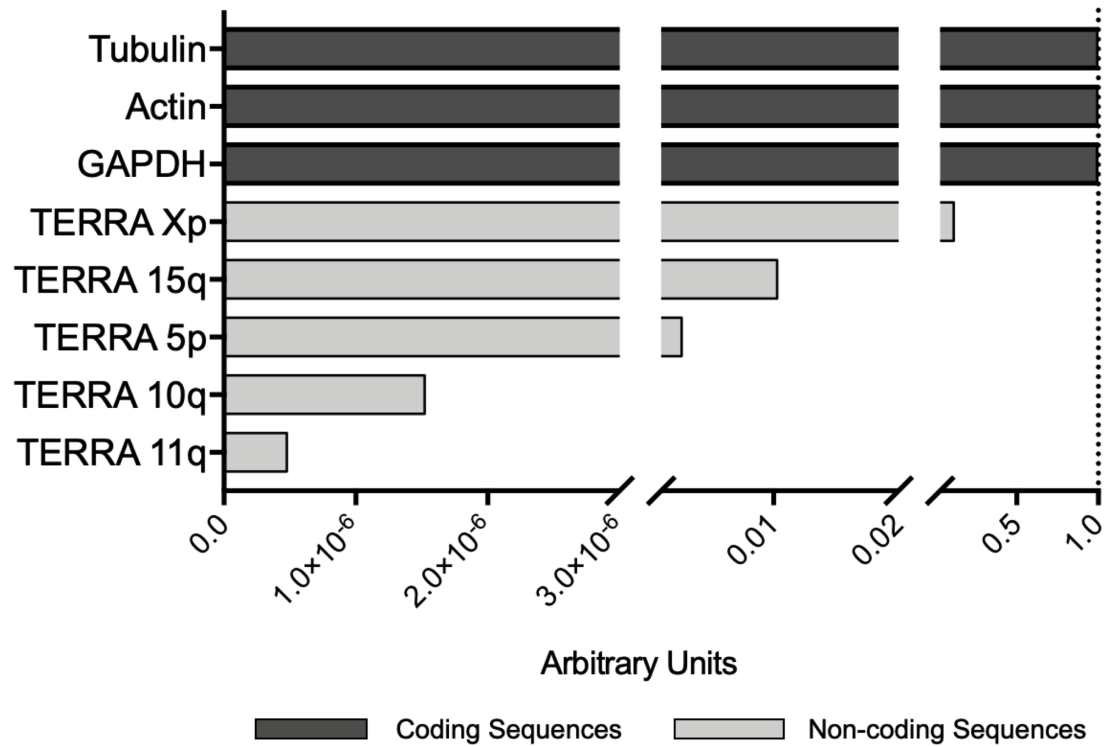

**Figure S1. The analyzed TERRA loci do not have any coding potential.** The coding probability of the analyzed sequences was verified using the coding potential calculator of the Center for Bioinformatics, Peking University, Beijing (<http://cpc2.gao-lab.org/index.php>). The *in silico* analysis confirmed that none of the sequences amplified using the listed TERRA primers (Supplementary Table 1) had neither ORF integrity nor any coding probability.

## TERRA Abundance

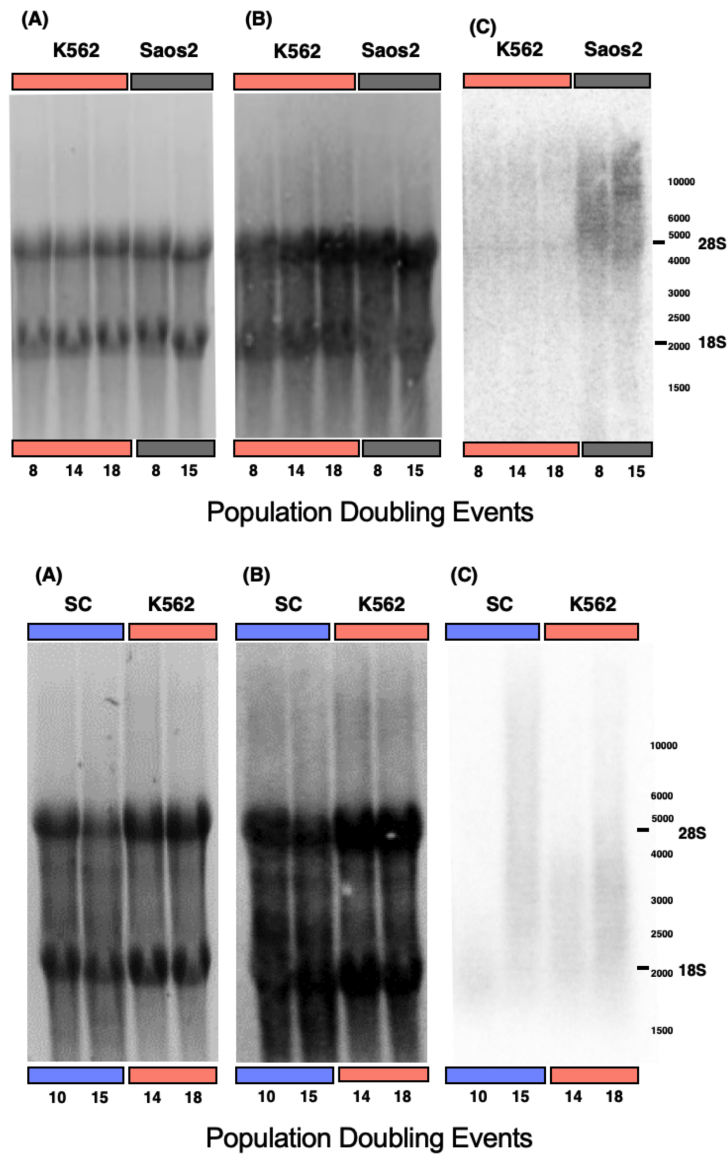

**Figure S2. Northern blot for analysis of TERRA abundance.** (Upper panel) TERRA abundance in different passages of K562 and Saos2 cells. (Lower panel) TERRA abundance in different passages of SC and K562 cells. In both panels: (A) Agarose gel after RNA electrophoresis. (B) Nylon membrane after RNA blotting. (C) Autoradiography after dCTP[P32]-labeled probe hybridization.

## Quantitative-FISH Analysis

### (A) SC 27 PDs

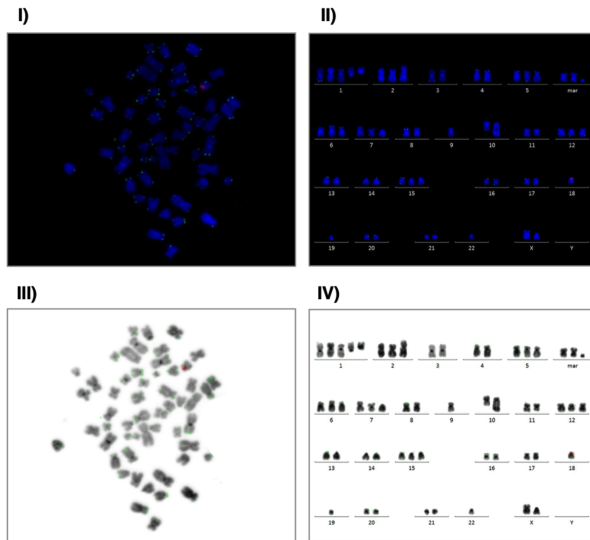

### (B) K562 31 PDs

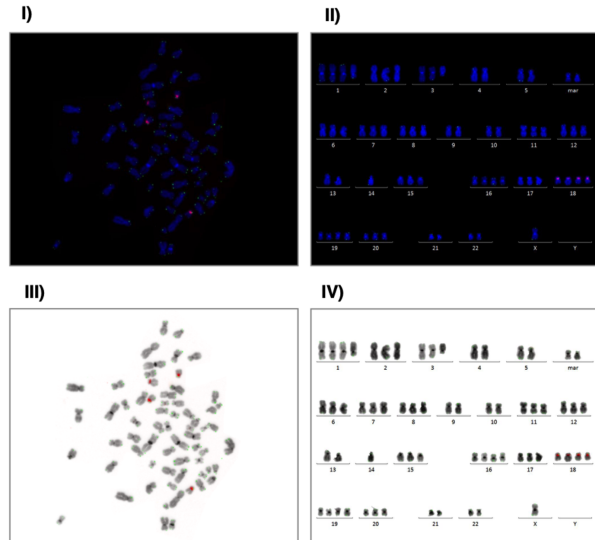

**Figure S3. Metaphases and Karyograms for Q-FISH analysis.** (A) SC cells after 27 population doubling events. (Upper panel) I) Metaphase hybridized with a pant-telomeric FitC probe, a centromeric Cy5 probe for chromosome 18, and counterstained with DAPI. II) Karyogram of I). (Lower panel) III) Grayscale-converted DAPI counterstain of the metaphase shown in I). IV) Negative/False color of the karyogram shown in II). (B) K562 cells after 31 population doubling events. (Upper panel) I) Metaphase hybridized with a pant-telomeric FitC probe, a centromeric Cy5 probe for chromosome 18, and counterstained with DAPI. II) Karyogram of I). (Lower panel) III) Grayscale-converted DAPI counterstain of the metaphase shown in I). IV) Negative/False color of the karyogram shown in II).

| Probes for Northern Blot  |        |                                              |                                  |           |
|---------------------------|--------|----------------------------------------------|----------------------------------|-----------|
| Target                    | Probe  | Sequence (5' -3')                            |                                  |           |
| U6                        | Rv     | CGCTTCACGAATTTGCGTGTATCCTTGCGCAGGGGCCATGC    |                                  |           |
| TERRA                     | Rv     | CCCTAACCCTAACCCTAACCCTAACCCTAACCCTAACCCTAACC |                                  |           |
| Primers for qPCR analysis |        |                                              |                                  |           |
| Transcript                | Primer | Sequence (5' -3')                            | Known Loci                       | Reference |
| 5p-TERRA                  | Fw     | CGGTGTACAGGATTACAGGG                         | 1 (5p)                           | -         |
|                           | Rv     | GCTTTGGGACAACCTCGAGGC                        |                                  |           |
| 10q-TERRA                 | Fw     | GCCTTGCCCTTGGGAGAATCT                        | 7                                | [59]      |
|                           | Rv     | AAAGCGGGAAACGAAAAGC                          | (1q, 2q, 4q, 10q, 13q, 21q, 22q) |           |
| 11q-TERRA                 | Fw     | CAGACCTTGGAGGCACGGCCTTCG                     | 1 (11q)                          | -         |
|                           | Rv     | CCCTGATTATTCAGGGCTGCAAAG                     |                                  |           |
| 15q-TERRA                 | Fw     | TGCAACCGGGAAAGATTTTATT                       | 5                                | [59]      |
|                           | Rv     | GCGTGGCTTTGGGACAAC                           | (1q, 8p, 15q, 16p, 21q, 22q)     |           |
| Xp-TERRA                  | Fw     | GAGTGAAAGAACGAAGCTTCC                        | 4                                | -         |
|                           | Rv     | CCCTCTGAAAGTGGACCTAT                         | (Xp (2), Yp (2))                 |           |
| U6                        | Fw     | CTCGCTTCGGCAGCACA                            | na                               | [60]      |
|                           | Rv     | AACGCTTCACGAATTTGCG                          |                                  |           |
| hTERT                     | Fw     | AGGGGCAAGTCCTACGTCCAGT                       | na                               | [10]      |
|                           | Rv     | CACCAACAAGAAATCATCCACC                       |                                  |           |
| GAPDH                     | Fw     | ACCCACTCCTCCACCTTTG                          | na                               | -         |
|                           | Rv     | CTCTTGTGCTCTTGCTGGG                          |                                  |           |
| Primers for ChIP analysis |        |                                              |                                  |           |
| Transcript                | Primer | Sequence (5' -3')                            | Histone Mark Enrichment          |           |
| p53 Promoter              | Fw     | TGCTGGGAGTTGTAGTCTG                          | CTCF                             |           |
|                           | Rv     | GATGCAGAAGAGGTGCAAG                          |                                  |           |
| GAPDH Exons 5-6           | Fw     | GGAGTCCACTGGCGTCTTC                          | H3K4me3                          |           |
|                           | Rv     | GGTTCACACCCATGACGAAC                         |                                  |           |
| GAPDH 5'UTR- Exon 1       | Fw     | GTTTCTATAAATTGAGCCCGCAG                      | Ser5-P RNA Pol 2                 |           |
|                           | Rv     | AAAAGAAGATGCGGCTGACTG                        |                                  |           |
| MYT1 5'UTR                | Fw     | CACCCCAATTACAGCAGAT                          | H3K9me3                          |           |
|                           | Rv     | TACGCTACCCATGAACCCT                          |                                  |           |
| OCT4/POU5F1 Exon 1        | Fw     | AGTGCCCACTAACTTCTA                           | H4K20me3                         |           |
|                           | Rv     | AGGGTCTCTCTTTCTGTCTCT                        |                                  |           |
| SOX2-OT Intron            | Fw     | CTTTCAGTTTCGTTGCTCCAACCCTGAC                 | H3K27me3                         |           |
|                           | Rv     | CCCTTCTTCCCTTTTGTGCTGCTCTCC                  |                                  |           |

**Table S1. List of the used primers and probes and their sequences.** The primers for TERRA expression analysis include other loci that have been previously reported.
